# Supplementary material
Source: publisher site journal article supplement (https://www.degruyterbrill.com/publication/journal_key/IJCRE/downloadAsset/IJCRE_RicardoGomezRomero.docx)
Supplement: Supplementary file 1 [file IJCRE_RicardoGomezRomero.docx]

**Special Issue to be published in the IJCRE (International Journal of Chemical Reactor Engineering), to honor Dr. Jose Ricardo Gomez Romero (1944-2023).**

We are pleased to announce that the selection of manuscripts for the Special Issue to Honor Dr. Jose Ricardo Gomez Romero (1944 – 2023), a distinguished professor of Universidad Autonoma Metropolitana (UAM), Mexico City, is now open (<http://www.degruyter.com/view/j/ijcre>).

All manuscripts for the Special Issue are peer-reviewed before acceptance for publication. Manuscripts have to be submitted in their final manuscript form to the IJCRE, no later than December 31, 2025. All manuscripts have to be submitted with the names of at least 4 proposed reviewers indicating reviewer name, reviewer institution, reviewer researcher role (professor, research associate, post-doctoral fellow, graduate student) and the reason for reviewer selection (eg. recent relevant manuscripts published by the reviewer). When submitting your manuscript, please do not forget to select, the folder ”**Special Issue to Honor Dr. Jose Ricardo Gomez Romero”**.

Dr. Benito Serrano Rosales ([beniser@prodigy.net.mx](mailto:beniser@prodigy.net.mx)), retired professor from Universidad Autonoma de Zacatecas, Mexico and Dr. Alejandro Perez Larios ([alarios@cualtos.udg.m](mailto:alarios@cualtos.udg.m)x), Universidad de Guadalajara, are acting as Guest Editors. For advice and inquiries, including manuscript suitability for the Special Issue, please contact Dr. Benito Serrano Rosales or Dr. Alejandro Perez Larios or directly to the journal.

Thank you for your interest in submitting your work to the Special Issue to Honor Dr. Jose Ricardo Gomez Romero.
